# Supplementary material
Source: PubMed Central journal article supplement (PMC2663331)
Supplement: supp_90_12_2631__1.pdf [file supp_90_12_2631__1.pdf]

TABLE E-1 Patient Demographic and Outcome Data

| Patient | Foot  | Age at Time of Surgery (years) | Age at Final Follow-up (years) | Smoker | Index Procedure*         | Subsequent Surgery*                                | SF-36 MCS | SF-36 PCS | FFI Pain | FFI Disability | FFI Activity Limitation | Talo-First Metatarsal Angle | Hindfoot Varus† |
|---------|-------|--------------------------------|--------------------------------|--------|--------------------------|----------------------------------------------------|-----------|-----------|----------|----------------|-------------------------|-----------------------------|-----------------|
| 1       | Right | 14.0                           | 27.0                           | No     | PL→PB; ATT; MTO; EHL     | None                                               | 48.3      | 43.2      | 44.4     | 39.5           | 13.3                    |                             |                 |
| 2       | Left  | 9.0                            | 41.0                           | Yes    | PL→PB; PF; MTO; EHL      | None                                               | 55.8      | 31.0      | 58.7     | 54.3           | 13.3                    | 8.0                         | -12.5           |
|         | Right | 9.8                            | 41.0                           |        | PL→PB; PF; MTO; EHL      | None                                               |           |           | 63.5     | 54.3           | 13.3                    | 9.0                         | -15.3           |
| 3       | Left  | 12.9                           | 38.8                           | Yes    | PL→PB; EHL; PF           | None                                               | 64.5      | 17.3      | 2.5      | 45.7           | 33.3                    | 0                           | -11.9           |
|         | Right | 10.9                           | 38.8                           |        | PL→PB; EHL; PF           | ATT, EDC to cuboid                                 |           |           | 64.2     | 45.7           | 33.3                    | -2.0                        | 4.5             |
| 4       | Left  | 12.8                           | 23.6                           | Yes    | PL→PB; PF; ATT; EHL      | None                                               | 54.9      | 31.7      | 39.5     | 43.2           | 28.9                    | 8.0                         | -8.1            |
|         | Right | 13.7                           | 23.6                           |        | PL→PB; PF; MTO; EHL; ATT | None                                               |           |           | 39.5     | 43.2           | 28.9                    | 7.0                         | -8.9            |
| 5       | Left  | 17.7                           | 38.1                           | No     | MTO; PF; ATT             | None                                               | 61.1      | 41.2      | 12.7     | 44.4           | 8.9                     |                             |                 |
|         | Right | 16.9                           | 38.1                           |        | MTO; PF; ATT             | None                                               |           |           | 12.7     | 44.4           | 8.9                     |                             |                 |
| 6       | Left  | 25.1                           | 53.8                           | No     | MTO; EHL; PL→PB; ATT     | None                                               | 46.3      | 25.9      | 9.9      | 60.5           | 20.0                    | 7.0                         | 0               |
|         | Right | 26.1                           | 53.8                           |        | MTO; PL→PB; ATT          | None                                               |           |           | 9.9      | 60.5           | 20.0                    | 8.5                         | -20.8           |
| 7       | Left  | 16.3                           | 48.3                           | No     | PL→PB; PF; MTO; EHL      | None                                               | 48.4      | 59.5      | 25.4     | 0              | 6.7                     |                             |                 |
|         | Right | 16.3                           | 48.3                           |        | PL→PB; PF; MTO; EHL      | None                                               |           |           | 25.4     | 0              | 6.7                     |                             |                 |
| 8       | Left  | 15.2                           | 48.6                           | Yes    | PL→PB; PF; MTO; EHL      | Calcaneocuboid fusion, posterior tibialis transfer | 54.0      | 28.1      | 56.8     | 63.0           | 33.3                    | -4.0                        | -18.0           |
|         | Right | 15.2                           | 48.6                           |        | PL→PB; PF; MTO; EHL      | None                                               |           |           | 50.6     | 63.0           | 33.3                    | 0                           | -16.1           |

Ward eAppendix

|    |       |      |      |     |                           |                             |      |      |      |      |      |      |       |
|----|-------|------|------|-----|---------------------------|-----------------------------|------|------|------|------|------|------|-------|
| 9  | Left  | 8.7  | 20.5 | Yes | PL→ PB; PF; MTO; ATT      | None                        | 62.4 | 48.8 | 3.7  | 11.1 | 6.7  | 10.0 | -32.7 |
| 10 | Right | 18.0 | 44.4 | No  | PL→ PB; PF; MTO; EHL      | None                        | 49.2 | 55.0 | 0    | 16.1 | 3.3  | 9    | -23.4 |
| 11 | Left  | 11.3 | 38.9 | No  | PL→ PB; PF; MTO           | None                        | 52.6 | 23.6 | 19.8 | 32.1 | 22.2 |      |       |
| 12 | Left  | 11.6 | 38.7 | Yes | PL→ PB; PF; MTO; EHL      | Posterior tibialis transfer | 33.9 | 24.9 |      |      |      |      |       |
|    | Right | 11.6 | 38.7 |     | PL→ PB; PF; MTO; EHL      | Posterior tibialis transfer |      |      |      |      |      |      |       |
| 13 | Left  | 17.5 | 42.2 | Yes | PL→ PB; PF; MTO; EHL      | None                        | 65.8 | 32.7 | 51.9 | 43.2 | 13.3 | 9.0  | -10.8 |
|    | Right | 17.5 | 42.2 |     | PL→ PB; PF; MTO; EHL      | None                        |      |      | 66.7 | 43.2 | 13.3 | 7.0  | -5.9  |
| 14 | Left  | 14.1 | 45.5 | No  | PL→ PB; PF; MTO; EHL; ATT | None                        | 53.2 | 55.5 | 0    | 0    | 0    | 10.5 | -11.6 |
|    | Right | 14.1 | 45.5 |     | PL→ PB; PF; MTO; EHL; ATT | None                        |      |      | 0    | 0    | 0    | 10.0 | -15.6 |
| 15 | Right | 20.2 | 51.6 | No  | PL→ PB; PF; MTO; EHL      | None                        | 59.4 | 47.5 | 40.7 | 17.3 | 4.4  | 7.0  | -18.0 |
| 16 | Left  | 16.1 | 38.0 | Yes | PL→ PB; PF; MTO; ATT      | None                        | 30.7 | 26.5 | 67.9 | 66.7 | 57.8 |      |       |
|    | Right | 21.2 | 38.0 |     | PF; MTO; ATT              | None                        |      |      | 63.0 | 66.7 | 57.8 |      |       |
| 17 | Left  | 17.4 | 50.4 | No  | MTO; PL→ PB               | None                        | 50.6 | 51.9 | 2.5  | 33.3 | 0    | 0    | -12.0 |
|    | Right | 17.4 | 50.4 |     | MTO; PL→ PB               | None                        |      |      | 0    | 33.3 | 0    | 8.5  |       |
| 18 | Left  | 17.3 | 37.8 | Yes | PL→ PB; PF; MTO; EHL      | Midfoot wedge osteotomy     | 20.5 | 42.4 | 65.4 | 60.5 | 44.4 |      |       |
| 19 | Left  | 20.6 | 48.9 | No  | PL→ PB; MTO; EHL          | None                        | 53.2 | 28.3 | 49.4 | 55.6 | 26.7 | 9.0  | -22.0 |
| 20 | Left  | 14.9 | 46.9 | Yes | PL→ PB; PF; MTO; EHL      | None                        | 39.5 | 27.4 | 26.2 | 50.0 | 43.3 | 3.0  | -17.5 |
|    | Right | 14.9 | 46.9 |     | PL→ PB; PF; MTO; EHL      | None                        |      |      | 53.2 | 50.0 | 43.3 | 17.5 | -23.5 |

Ward eAppendix

|    |       |      |      |     |                     |                                              |      |      |      |      |      |      |       |
|----|-------|------|------|-----|---------------------|----------------------------------------------|------|------|------|------|------|------|-------|
| 21 | Left  | 22.4 | 50.8 | No  | PL→PB; PF; MTO; EHL | None                                         | 53.8 | 54.2 | 24.7 | 28.4 | 2.2  |      |       |
| 22 | Left  | 12.7 | 39.9 | Yes | PL→PB; PF; MTO; EHL | None                                         | 20.9 | 27.3 | 39.7 | 53.1 | 44.4 | 10.5 | -10.3 |
|    | Right | 12.7 | 39.9 |     | PL→PB; PF; MTO; EHL | Ankle arthrodesis                            |      |      | 56.4 | 53.1 | 44.4 | 4.0  | -46.0 |
| 23 | Left  | 16.2 | 48.3 | No  | PL→PB; PF; MTO; EHL | ATT, release of adhesions to tendon transfer | 57.2 | 37.3 | 42.9 | 51.9 | 20.0 | 2.0  | -12.0 |
| 24 | Left  | 9.6  | 31.7 | Yes | PL→PB; PF; EHL      | None                                         | 61.1 | 27.4 | 66.7 | 67.9 | 53.3 |      |       |
|    | Right | 9.6  | 31.7 |     | PL→PB; PF; EHL      | ATT                                          |      |      | 67.9 | 67.9 | 53.3 |      |       |
| 25 | Left  | 14.8 | 43.5 | No  | PL→PB; PF           | None                                         | 47.8 | 52.7 | 13.6 | 8.3  | 2.2  | 13.0 | -21.3 |
|    | Right | 14.8 | 43.5 |     | PL→PB; PF; MTO; EHL | None                                         |      |      | 25.9 | 8.3  | 2.2  | 8.0  | -24.5 |

\* PL→PB: peroneus longus to peroneus brevis transfer. PF: plantar fasciotomy. MTO: First metatarsal osteotomy. EHL: extensor hallucis longus recession. ATT: tibialis anterior transfer, EDC: extensor digitorum communis tendon. †Negative values indicate hindfoot varus. Positive values indicate hindfoot valgus.
